# Supplementary material for: N-Heterocyclic carbene copper catalyzed quinoline synthesis from 2-aminobenzyl alcohols and ketones using DMSO as an oxidant at room temperature
Source: Royal Society of Chemistry journal article supplement (doi:10.1039/c9ra04926f), 2019-01-01

–Supporting Information–

**N-Heterocyclic Carbene Copper Catalyzed Quinolines Synthesis  
from 2-Aminobenzyl Alcohols and Ketones Using DMSO as an  
Oxidant at Room Temperature**

Jingxiu Xu,<sup>a</sup> Qingmao Chen,<sup>a</sup> Zhigao Luo,<sup>a</sup> Xiaodong Tang<sup>b\*</sup> and Jinwu Zhao<sup>a\*</sup>

<sup>a</sup> School of Pharmacy, Guangdong Medical University, Dongguan 523808, China. E-Mail: jwzhao@gdmu.edu.cn.

<sup>b</sup> School of Pharmaceutical Sciences, Southern Medical University, Guangzhou 510515, China. E-Mail: tangxdong@smu.edu.cn.

**Table of Contents**

|                                                               |    |
|---------------------------------------------------------------|----|
| <b>1. General information</b> .....                           | S2 |
| <b>2. Typical procedure for synthesis of quinolines</b> ..... | S2 |
| <b>3. Mechanistic study as depicted in Eq. 1</b> .....        | S2 |
| <b>4. Characterization data of products</b> .....             | S2 |
| <b>5. References</b> .....                                    | S8 |
| <b>6. Copies of NMR spectra</b> .....                         | S9 |

## 1. General information

KOH was dried in vacuum oven at 50 °C for 24h. Toluene and DMSO were dried by distilling over CaH<sub>2</sub>. Other reagents were of analytical grade and obtained from commercial suppliers and used without further purification. <sup>1</sup>H and <sup>13</sup>C NMR spectra were obtained on a Bruker AVANCE III HD 400 at 400 MHz and 100 MHz respectively, using CDCl<sub>3</sub> or DMSO-D<sub>6</sub> as the solvent with tetramethylsilane (TMS) as an internal standard at room temperature. Melting points were measured using SGW X-4B and values are uncorrected. GC-MS were performed on Thermo Trace DSQ.

## 2. Typical procedure for synthesis of quinolines

A magnetic stir-bar, 2-aminobenzyl alcohol **1** (0.5mmol), ketone **2** (0.5 mmol), KOH (84.2 mg, 3 equiv), IPrCuCl (12.2mg, 5 mol%), DMSO (312.5 mg, 8 equiv) and Toluene (3 mL) were added into a 25 mL test tube and then sealed. The reaction mixture was stirred magnetically at room temperature for 6h. When the reaction was finished, 10 mL water was added. The aqueous solution was extracted with ethyl acetate (3 × 10 mL) and the combined extract was dried with anhydrous MgSO<sub>4</sub>. The solvent was vacuumed and the crude product was purified by flash column chromatography on a silica gel (petroleum ether/ethyl acetate) to afford the product.

## 3. Mechanistic study as depicted in Eq. 1

After 2-aminobenzyl alcohol **1** reacted under the standard condition, 10 mL water was added. The aqueous solution was extracted with 10 mL ethyl acetate and the extract was analyzed by GC/MS using dodecane as an internal standard.

## 4. Characterization data of products

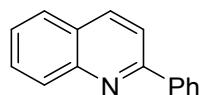

**2-phenylquinoline (3aa)** <sup>1</sup> According to the general procedure, **3aa** (91.3mg, 89%) was obtained from 2-aminobenzyl alcohol **1a** (61.6mg, 0.5mmol) and acetophenone **2a** (60.1mg, 0.5mmol) as a white solid, mp 82-83 °C; <sup>1</sup>H NMR (400 MHz, CDCl<sub>3</sub>) δ 8.26 – 8.08 (m, 4H), 7.85 (dd, J = 20.0, 8.3 Hz, 2H), 7.73 (t, J = 7.7 Hz, 1H), 7.53 (dd, J = 7.5, 4.9 Hz, 2H), 7.47 (t, J = 7.3 Hz, 1H); <sup>13</sup>C NMR (101 MHz, CDCl<sub>3</sub>) δ 157.3, 148.2, 139.6, 136.8, 129.7, 129.7, 129.3, 128.8, 127.6, 127.4, 127.2, 126.3, 119.0.

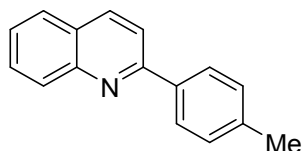

**2-(p-tolyl)quinoline (3ba)** <sup>1</sup> According to the general procedure, **3ba** (103.1mg, 94%) was obtained from 2-aminobenzyl alcohol **1a** (61.6mg, 0.5mmol) and 4'-methylacetophenone **2b** (67.1mg, 0.5mmol) as a white solid, mp 84-85 °C; <sup>1</sup>H NMR (400 MHz, CDCl<sub>3</sub>) δ 8.04 (dd, J = 8.5, 1.1 Hz, 1H), 8.01 – 7.89 (m, 3H), 7.75 – 7.60 (m, 2H), 7.56 (ddd, J = 8.4, 6.8, 1.5 Hz, 1H), 7.34 (ddd, J = 8.1, 6.9, 1.2 Hz, 1H), 7.18

(d, J = 7.9 Hz, 2H), 2.28 (s, 3H);  $^{13}\text{C}$  NMR (101 MHz,  $\text{CDCl}_3$ )  $\delta$  157.4, 148.4, 139.4, 137.0, 136.7, 129.8, 129.6, 129.6, 127.5, 127.5, 127.2, 126.1, 118.9, 21.4.

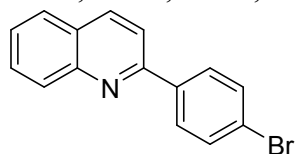

**2-(4-bromophenyl)quinoline (3ca)** <sup>1</sup> According to the general procedure, **3ca** (115.1mg, 81%) was obtained from 2-aminobenzyl alcohol **1a** (61.6mg, 0.5mmol) and 4'-bromoacetophenone **2c** (99.5mg, 0.5mmol) as a white solid, mp 121-122 °C;  $^1\text{H}$  NMR (400 MHz,  $\text{CDCl}_3$ )  $\delta$  8.18 (dd, J = 14.6, 8.6 Hz, 2H), 8.07 – 7.98 (m, 2H), 7.81 (d, J = 8.5 Hz, 2H), 7.73 (ddd, J = 8.4, 6.8, 1.5 Hz, 1H), 7.68 – 7.61 (m, 2H), 7.53 (ddd, J = 8.1, 6.8, 1.2 Hz, 1H);  $^{13}\text{C}$  NMR (101 MHz,  $\text{CDCl}_3$ )  $\delta$  156.0, 148.2, 138.4, 137.0, 131.9, 129.9, 129.7, 129.1, 127.5, 127.2, 126.5, 123.9, 118.5.

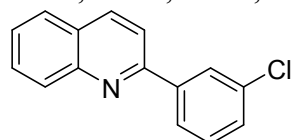

**2-(3-chlorophenyl)quinoline (3da)** <sup>2</sup> According to the general procedure, **3da** (93.5mg, 78%) was obtained from 2-aminobenzyl alcohol **1a** (61.6mg, 0.5mmol) and 3'-chloroacetophenone **2d** (77.3mg, 0.5mmol) as a white solid, mp 93-94 °C;  $^1\text{H}$  NMR (400 MHz,  $\text{CDCl}_3$ )  $\delta$  8.28 – 8.08 (m, 3H), 7.98 (t, J = 4.5 Hz, 1H), 7.76 (dd, J = 8.4, 5.0 Hz, 2H), 7.70 (t, J = 7.8 Hz, 1H), 7.49 (t, J = 7.6 Hz, 1H), 7.39 (d, J = 4.5 Hz, 2H);  $^{13}\text{C}$  NMR (101 MHz,  $\text{CDCl}_3$ )  $\delta$  155.7, 148.3, 141.5, 137.0, 135.0, 130.1, 129.9, 129.8, 129.3, 127.8, 127.5, 127.4, 126.7, 125.6, 118.7.

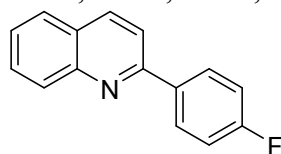

**2-(4-fluorophenyl)quinoline (3ea)** <sup>1</sup> According to the general procedure, **3ea** (94.9mg, 85%) was obtained from 2-aminobenzyl alcohol **1a** (61.6mg, 0.5mmol) and 4'-fluoroacetophenone **2e** (69.1mg, 0.5mmol) as a white solid, mp 91-92 °C;  $^1\text{H}$  NMR (400 MHz,  $\text{CDCl}_3$ )  $\delta$  8.24 – 8.07 (m, 4H), 7.78 (td, J = 5.5, 2.8 Hz, 2H), 7.71 (ddd, J = 8.4, 6.8, 1.5 Hz, 1H), 7.50 (ddd, J = 8.0, 6.7, 1.1 Hz, 1H), 7.23 – 7.01 (m, 2H);  $^{13}\text{C}$  NMR (101 MHz,  $\text{CDCl}_3$ )  $\delta$  165.1, 162.6, 156.2, 148.3, 137.0, 135.9, 135.8, 129.9, 129.7, 129.5, 129.4, 127.5, 127.1, 126.4, 118.6, 115.9, 115.7.

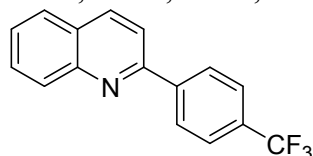

**2-(4-(trifluoromethyl)phenyl)quinoline (3fa)** <sup>1</sup> According to the general procedure, **3fa** (112.0mg, 82%) was obtained from 2-aminobenzyl alcohol **1a** (61.6mg, 0.5mmol) and 4'-trifluoromethylacetophenone **2f** (94.1mg, 0.5mmol) as a white solid, mp 129-130 °C;  $^1\text{H}$  NMR (400 MHz,  $\text{CDCl}_3$ )  $\delta$  8.20 – 8.04 (m, 4H), 7.79 – 7.68 (m, 2H), 7.69 – 7.57 (m, 3H), 7.44 (ddd, J = 8.1, 6.9, 1.2 Hz, 1H);  $^{13}\text{C}$  NMR (101 MHz,  $\text{CDCl}_3$ )  $\delta$  155.6, 148.3, 142.9, 142.9, 137.1, 131.2, 130.9, 123.0, 129.8, 127.8, 127.5, 127.4, 126.9, 125.8, 125.8, 125.7, 125.7, 125.6, 122.9, 118.7.

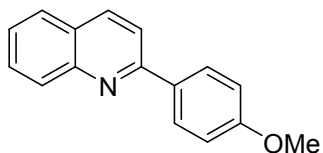

**2-(4-methoxyphenyl)quinoline (3ga)**<sup>1</sup> According to the general procedure, **3ga** (112.9mg, 96%) was obtained from 2-aminobenzyl alcohol **1a** (61.6mg, 0.5mmol) and 4'-methoxyacetophenone **2g** (75.1mg, 0.5mmol) as a white solid, mp 121-122 °C; <sup>1</sup>H NMR (400 MHz, CDCl<sub>3</sub>) δ 8.17 – 8.03 (m, 4H), 7.82 – 7.71 (m, 2H), 7.67 (ddd, J = 8.4, 6.9, 1.5 Hz, 1H), 7.44 (ddd, J = 8.1, 6.9, 1.2 Hz, 1H), 7.06 – 6.93 (m, 2H), 3.81 (s, 3H); <sup>13</sup>C NMR (101 MHz, CDCl<sub>3</sub>) δ 160.8, 156.9, 148.3, 136.6, 132.2, 129.6, 129.5, 128.9, 127.4, 126.9, 125.9, 118.5, 114.2, 55.4.

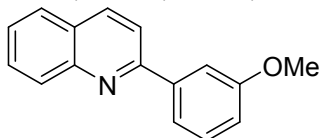

**2-(3-methoxyphenyl)quinoline (3ha)**<sup>3</sup> According to the general procedure, **3ha** (105.9mg, 90%) was obtained from 2-aminobenzyl alcohol **1a** (61.6mg, 0.5mmol) and 3'-methoxyacetophenone **2h** (75.1mg, 0.5mmol) as a colorless oil; <sup>1</sup>H NMR (400 MHz, CDCl<sub>3</sub>) δ 8.19 (dd, J = 8.1, 3.3 Hz, 2H), 7.83 (dd, J = 15.4, 8.0 Hz, 2H), 7.77 (s, 1H), 7.75 – 7.67 (m, 2), 7.52 (t, J = 7.2 Hz, 1H), 7.43 (t, J = 7.7 Hz, 1H), 7.01 (d, J = 7.8 Hz, 1H), 3.93 (s, 3H); <sup>13</sup>C NMR (101 MHz, CDCl<sub>3</sub>) δ 160.3, 157.3, 148.3, 141.3, 137.1, 130.07, 123.0, 129.9, 127.8, 127.5, 126.6, 120.3, 119.4, 115.7, 112.9, 55.8.

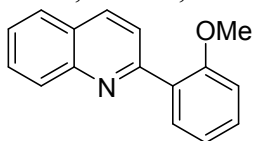

**2-(2-methoxyphenyl)quinoline (3ia)**<sup>3</sup> According to the general procedure, **3ia** (89.4mg, 76%) was obtained from 2-aminobenzyl alcohol **1a** (61.6mg, 0.5mmol) and 2'-methoxyacetophenone **2i** (75.1mg, 0.5mmol) as a colorless oil; <sup>1</sup>H NMR (400 MHz, CDCl<sub>3</sub>) δ 8.16 (dd, J = 16.8, 8.5 Hz, 2H), 7.94 – 7.79 (m, 3H), 7.70 (td, J = 7.5, 6.9, 1.5 Hz, 1H), 7.59 – 7.48 (m, 1H), 7.46 – 7.37 (m, 1H), 7.13 (t, J = 7.5 Hz, 1H), 7.03 (d, J = 8.3 Hz, 1H), 3.86 (s, 3H); <sup>13</sup>C NMR (101 MHz, CDCl<sub>3</sub>) δ 157.2, 157.1, 148.3, 135.1, 131.5, 130.3, 129.7, 129.6, 129.2, 127.4, 127.1, 126.2, 123.5, 121.3, 111.5, 55.7.

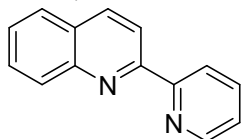

**2-(pyridin-2-yl)quinoline (3ja)**<sup>1</sup> According to the general procedure, **3ja** (86.6mg, 84%) was obtained from 2-aminobenzyl alcohol **1a** (61.6mg, 0.5mmol) and 1-(pyridin-2-yl)ethan-1-one **2j** (60.6mg, 0.5mmol) as a white solid, mp 94-95 °C; <sup>1</sup>H NMR (400 MHz, CDCl<sub>3</sub>) δ 8.72 (ddd, J = 4.7, 1.9, 0.9 Hz, 1H), 8.64 (dt, J = 8.0, 1.1 Hz, 1H), 8.55 (d, J = 8.6 Hz, 1H), 8.24 (dd, J = 8.6, 0.8 Hz, 1H), 8.17 (dq, J = 8.6, 0.9 Hz, 1H), 7.88 – 7.77 (m, 2H), 7.70 (ddd, J = 8.4, 6.9, 1.5 Hz, 1H), 7.51 (ddd, J = 8.1, 6.9, 1.2 Hz, 1H), 7.31 (ddd, J = 7.5, 4.8, 1.2 Hz, 1H); <sup>13</sup>C NMR (101 MHz, CDCl<sub>3</sub>) δ 156.3, 156.2, 149.2, 147.9, 136.9, 136.8, 129.8, 129.5, 128.3, 127.6, 126.7, 124.0, 121.8, 119.0.

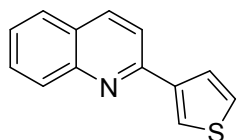

**2-(thiophen-3-yl)quinoline (3ka)**<sup>4</sup> According to the general procedure, **3ka** (95.1mg, 90%) was obtained from 2-aminobenzyl alcohol **1a** (61.6mg, 0.5mmol) and 1-(thiophen-3-yl)ethan-1-one **2k** (63.1mg, 0.5mmol) as a white solid, mp 123-124 °C; <sup>1</sup>H NMR (400 MHz, CDCl<sub>3</sub>) δ 8.10 (t, J = 7.7 Hz, 2H), 8.00 (d, J = 2.7 Hz, 1H), 7.86 (d, J = 4.9 Hz, 1H), 7.70 (dq, J = 14.7, 7.9 Hz, 3H), 7.46 (t, J = 7.4 Hz, 1H), 7.40 (dd, J = 5.0, 2.7 Hz, 1H); <sup>13</sup>C NMR (101 MHz, CDCl<sub>3</sub>) δ 153.4, 148.3, 142.8, 136.8, 129.8, 129.6, 127.6, 127.20, 127.0, 126.6, 126.2, 124.9, 119.2.

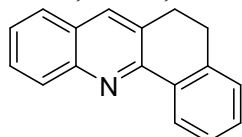

**5,6-dihydrobenzo[c]acridine (3la)**<sup>1</sup> According to the general procedure, **3la** (99.5mg, 86%) was obtained from 2-aminobenzyl alcohol **1a** (61.6mg, 0.5mmol) and 1-tetralone **2l** (73.1mg, 0.5mmol) as a white solid, mp 66-67 °C; <sup>1</sup>H NMR (400 MHz, CDCl<sub>3</sub>) δ 8.58 (d, J = 7.7 Hz, 1H), 8.13 (d, J = 8.4 Hz, 1H), 7.86 (s, 1H), 7.70 (d, J = 8.0 Hz, 1H), 7.63 (t, J = 7.7 Hz, 1H), 7.43 (dt, J = 11.9, 7.5 Hz, 2H), 7.35 (t, J = 7.3 Hz, 1H), 7.29 – 7.20 (m, 1H), 3.08 (dd, J = 8.3, 5.5 Hz, 2H), 2.97 (dd, J = 8.4, 5.5 Hz, 2H); <sup>13</sup>C NMR (101 MHz, CDCl<sub>3</sub>) δ 153.4, 147.6, 139.4, 134.7, 133.8, 130.6, 129.7, 129.4, 128.7, 128.0, 127.9, 127.4, 127.0, 126.1, 126.1, 28.9, 28.4.

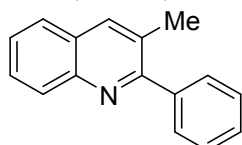

**3-methyl-2-phenylquinoline (3ma)**<sup>1</sup> According to the general procedure, **3ma** (53.7mg, 49%) was obtained from 2-aminobenzyl alcohol **1a** (61.6mg, 0.5mmol) and propiophenone **2m** (67.1mg, 0.5mmol) as a colorless oil; <sup>1</sup>H NMR (400 MHz, CDCl<sub>3</sub>) δ 8.13 (d, J = 8.5 Hz, 1H), 7.99 (s, 1H), 7.76 (d, J = 8.3 Hz, 1H), 7.69 – 7.62 (m, 1H), 7.59 (d, J = 7.8 Hz, 2H), 7.55 – 7.41 (m, 4H), 2.45 (s, 3H); <sup>13</sup>C NMR (101 MHz, CDCl<sub>3</sub>) δ 160.6, 146.7, 141.0, 136.8, 129.4, 129.3, 129.0, 128.8, 128.4, 128.3, 128.3, 127.7, 126.8, 126.5, 20.7.

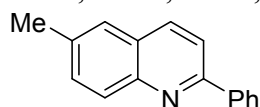

**6-methyl-2-phenylquinoline (3ab)**<sup>1</sup> According to the general procedure, **3ab** (102.0mg, 93%) was obtained from 2-amino-5-methylbenzyl alcohol **1b** (68.6mg, 0.5mmol) and acetophenone **2a** (60.1mg, 0.5mmol) as a white solid, mp 70-71 °C; <sup>1</sup>H NMR (400 MHz, CDCl<sub>3</sub>) δ 8.16 – 8.09 (m, 2H), 8.05 (d, J = 8.5 Hz, 1H), 8.00 – 7.95 (m, 1H), 7.71 (d, J = 8.6 Hz, 1H), 7.55 – 7.44 (m, 4H), 7.44 – 7.34 (m, 1H), 2.45 (s, 3H); <sup>13</sup>C NMR (101 MHz, CDCl<sub>3</sub>) δ 156.5, 146.9, 139.8, 136.1, 136.1, 131.9, 129.5, 129.2, 128.8, 127.5, 126.4, 118.9, 21.6.

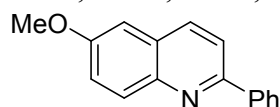

**6-methoxy-2-phenylquinoline (3ac)**<sup>5</sup> According to the general procedure, **3ac** (114.1mg, 97%) was obtained from 2-amino-5-methoxybenzyl alcohol **1c** (76.6mg, 0.5mmol) and acetophenone **2a** (60.1mg, 0.5mmol) as a white solid, mp 133-134 °C;

$^1\text{H}$  NMR (400 MHz,  $\text{CDCl}_3$ )  $\delta$  8.27 – 8.00 (m, 4H), 7.82 (dd,  $J = 8.7, 2.5$  Hz, 1H), 7.51 (t,  $J = 7.8$  Hz, 2H), 7.41 (dd,  $J = 24.9, 8.4$  Hz, 2H), 7.08 (s, 1H), 3.93 (s, 3H);  $^{13}\text{C}$  NMR (101 MHz,  $\text{CDCl}_3$ )  $\delta$  157.7, 155.0, 144.3, 139.7, 135.5, 131.1, 128.9, 128.8, 128.1, 127.3, 122.3, 119.2, 105.0, 55.5.

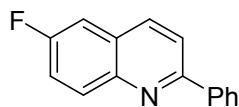

**6-fluoro-2-phenylquinoline (3ad)** <sup>1</sup> According to the general procedure, **3ad** (98.2mg, 88%) was obtained from 2-amino-5-fluorobenzyl alcohol **1d** (70.6mg, 0.5mmol) and acetophenone **2a** (60.1mg, 0.5mmol) as a white solid, mp 90-91°C;  $^1\text{H}$  NMR (400 MHz,  $\text{CDCl}_3$ )  $\delta$  8.27 – 8.07 (m, 4H), 7.89 (d,  $J = 8.5$  Hz, 1H), 7.63 – 7.34 (m, 5H);  $^{13}\text{C}$  NMR (101 MHz,  $\text{CDCl}_3$ )  $\delta$  161.6, 159.1, 145.3, 139.3, 136.2, 136.1, 132.2, 132.1, 129.4, 128.9, 127.7, 127.4, 120.0, 119.7, 110.6, 110.4.

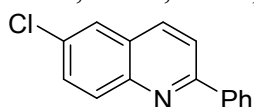

**6-chloro-2-phenylquinoline (3ae)** <sup>1</sup> According to the general procedure, **3ae** (103.1mg, 86%) was obtained from 2-amino-5-chlorobenzyl alcohol **1e** (78.8mg, 0.5mmol) and acetophenone **2a** (60.1mg, 0.5mmol) as a white solid, mp 111-112 °C;  $^1\text{H}$  NMR (400 MHz,  $\text{CDCl}_3$ )  $\delta$  8.10 – 8.05 (m, 2H), 8.02 (dt,  $J = 9.0, 0.6$  Hz, 1H), 7.89 (dd,  $J = 8.7, 0.8$  Hz, 1H), 7.70 (d,  $J = 8.6$  Hz, 1H), 7.62 (d,  $J = 2.4$  Hz, 1H), 7.56 (dd,  $J = 9.0, 2.4$  Hz, 1H), 7.49 – 7.38 (m, 3H);  $^{13}\text{C}$  NMR (101 MHz,  $\text{CDCl}_3$ )  $\delta$  157.4, 146.6, 139.2, 135.8, 131.9, 131.4, 130.5, 129.6, 129.0, 127.7, 127.6, 126.2, 119.7.

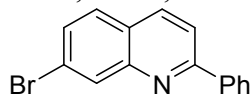

**7-bromo-2-phenylquinoline (3af)** <sup>1</sup> According to the general procedure, **3af** (126.4mg, 89%) was obtained from 2-amino-4-bromobenzyl alcohol **1f** (101.0mg, 0.5mmol) and acetophenone **2a** (60.1mg, 0.5mmol) as a white solid, mp 122-123°C;  $^1\text{H}$  NMR (400 MHz,  $\text{CDCl}_3$ )  $\delta$  8.37 – 8.28 (m, 1H), 8.16 – 8.06 (m, 2H), 8.03 (d,  $J = 8.6$  Hz, 1H), 7.76 (d,  $J = 8.5$  Hz, 1H), 7.59 – 7.39 (m, 5H);  $^{13}\text{C}$  NMR (101 MHz,  $\text{CDCl}_3$ )  $\delta$  158.1, 148.9, 139.1, 136.6, 132.0, 129.7, 128.9, 128.7, 127.6, 125.7, 123.7, 119.2.

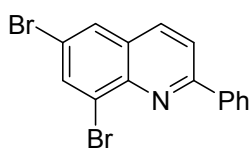

**7,8-dibromo-2-phenylquinoline (3ag)** <sup>6</sup> According to the general procedure, **3ag** (152.5mg, 84%) was obtained from 2-amino-3,5-dibromobenzyl alcohol **1g** (140.5mg, 0.5mmol) and acetophenone **2a** (60.1mg, 0.5mmol) as a yellow solid, mp 126-127°C;  $^1\text{H}$  NMR (400 MHz,  $\text{CDCl}_3$ )  $\delta$  8.20 – 8.13 (m, 2H), 8.02 (d,  $J = 2.1$  Hz, 1H), 7.86 (d,  $J = 8.6$  Hz, 1H), 7.77 – 7.69 (m, 2H), 7.51 – 7.41 (m, 3H);  $^{13}\text{C}$  NMR (101 MHz,  $\text{CDCl}_3$ )  $\delta$  157.5, 143.7, 138.3, 136.1, 135.8, 130.1, 129.3, 128.9, 128.7, 127.6, 126.5, 119.8, 119.3.

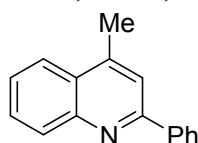

**4-methyl-2-phenylquinoline (3ah)** <sup>7</sup> According to the general procedure, **3ah** (29.6mg, 27%) was obtained from 1-(2-aminophenyl)ethan-1-ol **1h** (68.6mg, 0.5mmol)

and acetophenone **2a** (60.1mg, 0.5mmol). According the regulated procedure, a magnetic stir-bar, 1-(2-aminophenyl)ethan-1-ol **1h** (68.6mg, 0.5mmol) and acetophenone **2a** (60.1mg, 0.5mmol), KOH (84.2 mg, 3 equiv), IPrCuCl (12.2mg, 5 mol%), DMSO (2mL) and Toluene (1 mL) were added into a 25 mL test tube and then sealed. The reaction mixture was stirred magnetically at room temperature for 6h. When the reaction was finished, 10 mL water was added. The aqueous solution was extracted with ethyl acetate (3 × 10 mL) and the combined extract was dried with anhydrous MgSO<sub>4</sub>. The solvent was vacuumed and the crude product was purified by flash column chromatography on a silica gel (petroleum ether/ethyl acetate = 20 : 1) to afford the product **3ah** (83.3mg, 76%) as a white solid, mp 62-63°C; <sup>1</sup>H NMR (400 MHz, CDCl<sub>3</sub>) δ 8.23 – 8.08 (m, 3H), 7.87 (dd, J = 8.4, 1.4 Hz, 1H), 7.65 (ddd, J = 8.4, 6.9, 1.4 Hz, 1H), 7.60 (d, J = 1.1 Hz, 1H), 7.52 – 7.35 (m, 4H), 2.63 (d, J = 1.1 Hz, 3H); <sup>13</sup>C NMR (101 MHz, CDCl<sub>3</sub>) δ 157.0, 148.2, 144.8, 139.9, 130.3, 129.4, 129.2, 128.8, 127.6, 127.3, 126.0, 123.7, 119.7, 19.0.

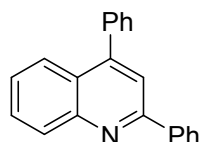

**2,4-diphenylquinoline (3ai)** <sup>8</sup> According to the general procedure, **3ai** (19.7mg, 14%) was obtained from (2-aminophenyl)(phenyl)methanol **1i** (99.6mg, 0.5mmol) and acetophenone **2a** (60.1mg, 0.5mmol). According the regulated procedure, a magnetic stir-bar, (2-aminophenyl)(phenyl)methanol **1i** (99.6mg, 0.5mmol) and acetophenone **2a** (60.1mg, 0.5mmol), KOH (84.2 mg, 3 equiv), IPrCuCl (12.2mg, 5 mol%), DMSO ( 2mL ) and Toluene (1 mL) were added into a 25 mL test tube and then sealed. The reaction mixture was stirred magnetically at room temperature for 6h. When the reaction was finished, 10 mL water was added. The aqueous solution was extracted with ethyl acetate (3 × 10 mL) and the combined extract was dried with anhydrous MgSO<sub>4</sub>. The solvent was vacuumed and the crude product was purified by flash column chromatography on a silica gel (petroleum ether/ethyl acetate) to afford the product **3ai** (91.4mg, 65%) as a white solid, mp 115-116°C; <sup>1</sup>H NMR (400 MHz, CDCl<sub>3</sub>) δ 8.23 (dd, J = 8.5, 1.2 Hz, 1H), 8.19 – 8.12 (m, 2H), 7.85 (dd, J = 8.4, 1.4 Hz, 1H), 7.76 (s, 1H), 7.66 (ddd, J = 8.4, 6.8, 1.5 Hz, 1H), 7.52 – 7.43 (m, 7H), 7.43 – 7.34 (m, 2H); <sup>13</sup>C NMR (101 MHz, CDCl<sub>3</sub>) δ 156.9, 149.2, 148.9, 139.7, 138.5, 130.3, 129.7, 129.6, 129.4, 128.9, 128.7, 128.5, 127.7, 126.4, 125.9, 125.7, 119.4.

## 5. References

- (1) R. Wang, H. Fan, W. Zhao and F. Li, *Org. Lett.*, 2016, **18**, 3558.
- (2) N. An, C. Tanmoy, K. Suvajit, C. Sushobhan and S. M. Shankar, *RSC Adv.*, 2014, **5**, 7654.
- (3) S. C. Chan and X. R. Wen, *J. Organomet. Chem.*, 2007, **692**, 4182.
- (4) M. Kuriyama, S. Matsuo, M. Shinozawa and O. Onomura, *Org. Lett.*, 2013, **15**, 2716.
- (5) X. Xu, X. Zhang, W. Liu, Q. Zhao, Z. Wang, L. Yu and F. Shi, *Tetrahedron Lett.* 2015, **56**, 3790.
- (6) J. Yu, Z. Li and W. Su, *Synth. Commun.*, 2013, **43**, 361.
- (7) Y. Zhu and C. Cai, *RSC Adv.*, 2014, **4**, 52911.
- (8) R. Martínez, D. J. Ramón and M. Yus, *J. Org. Chem.*, 2008, **73**, 9778.





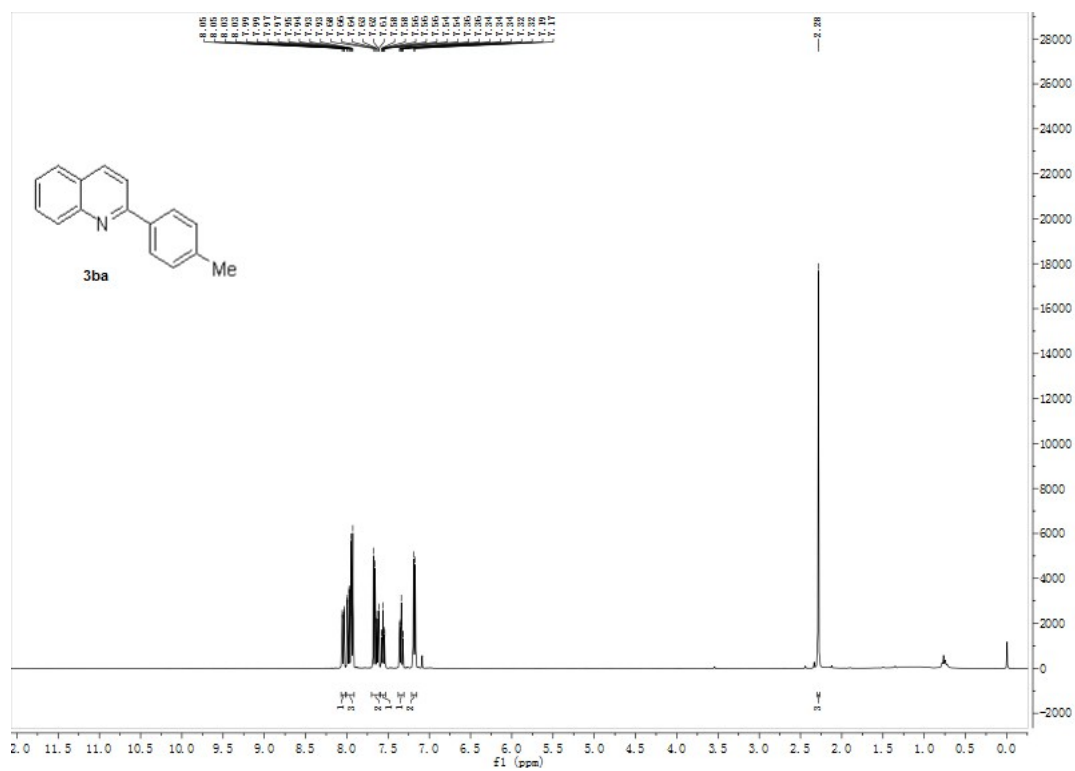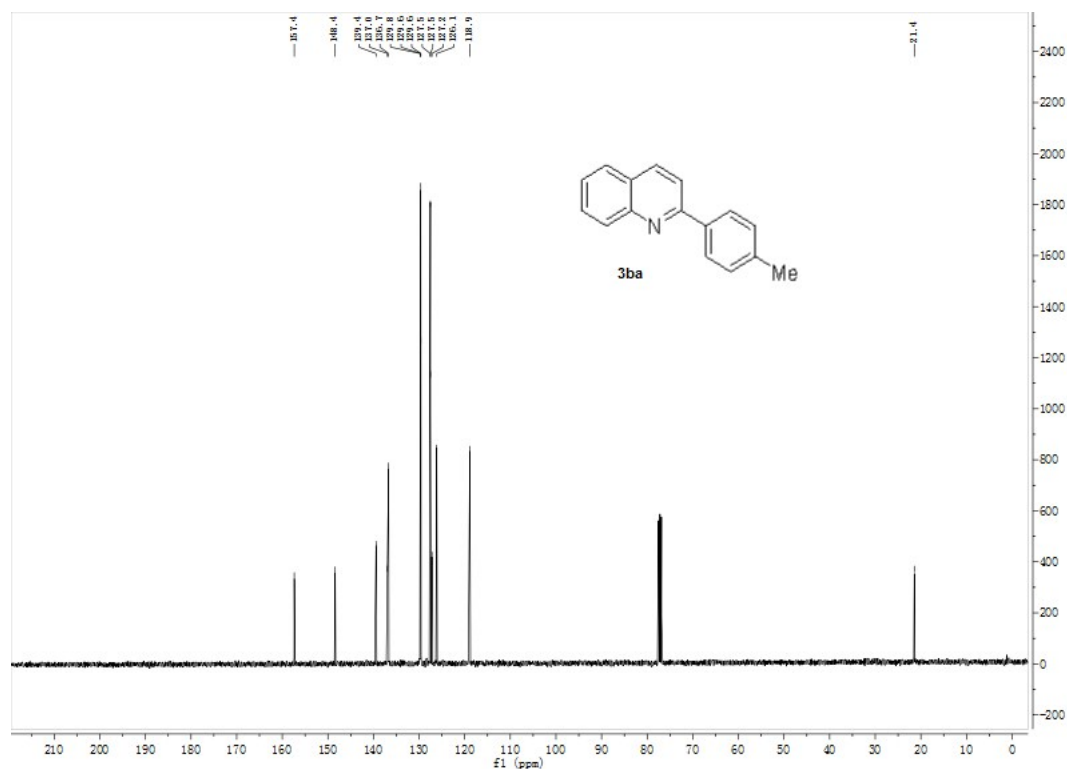







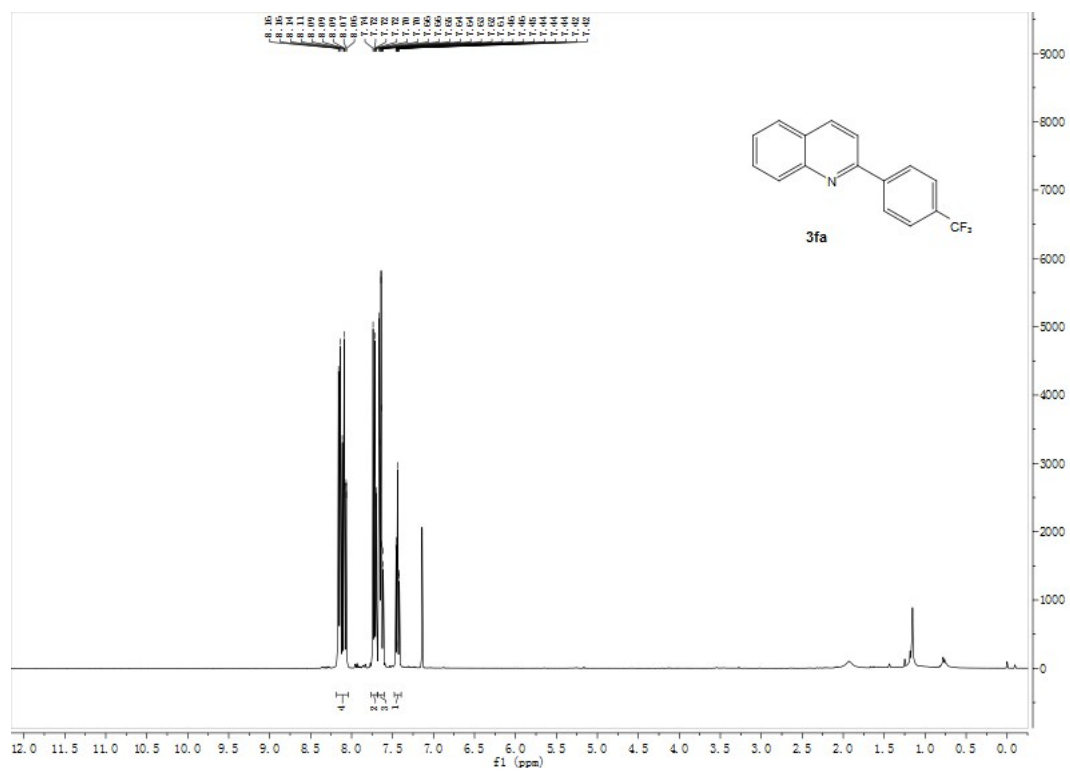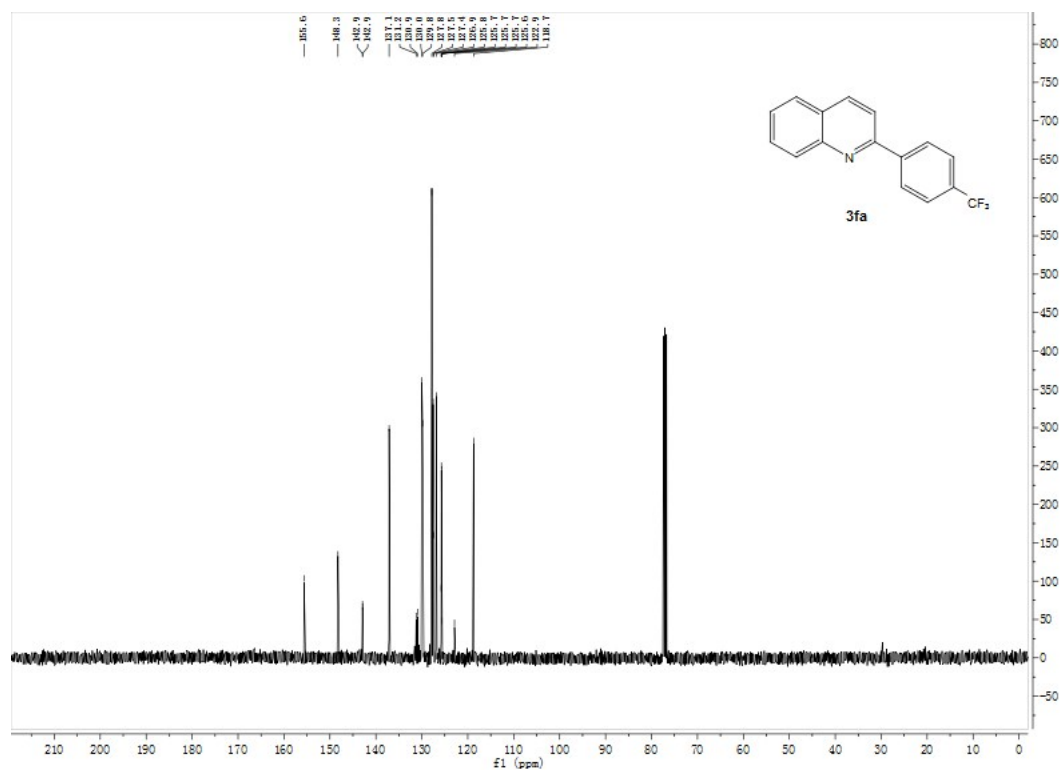

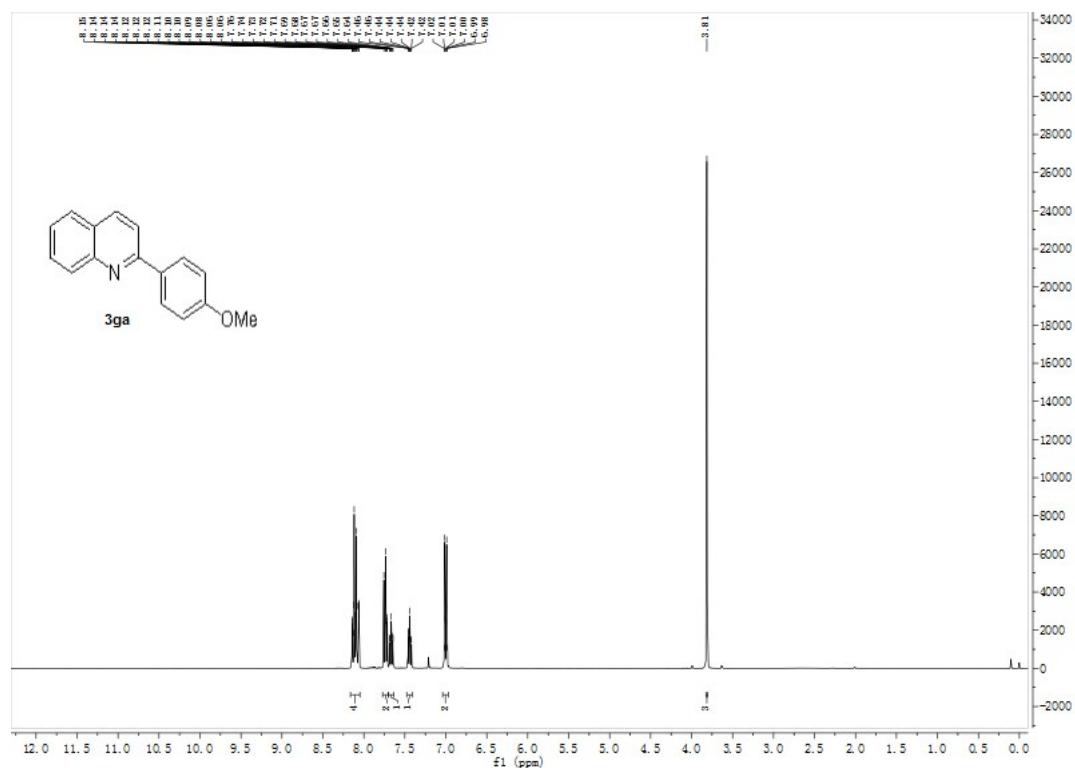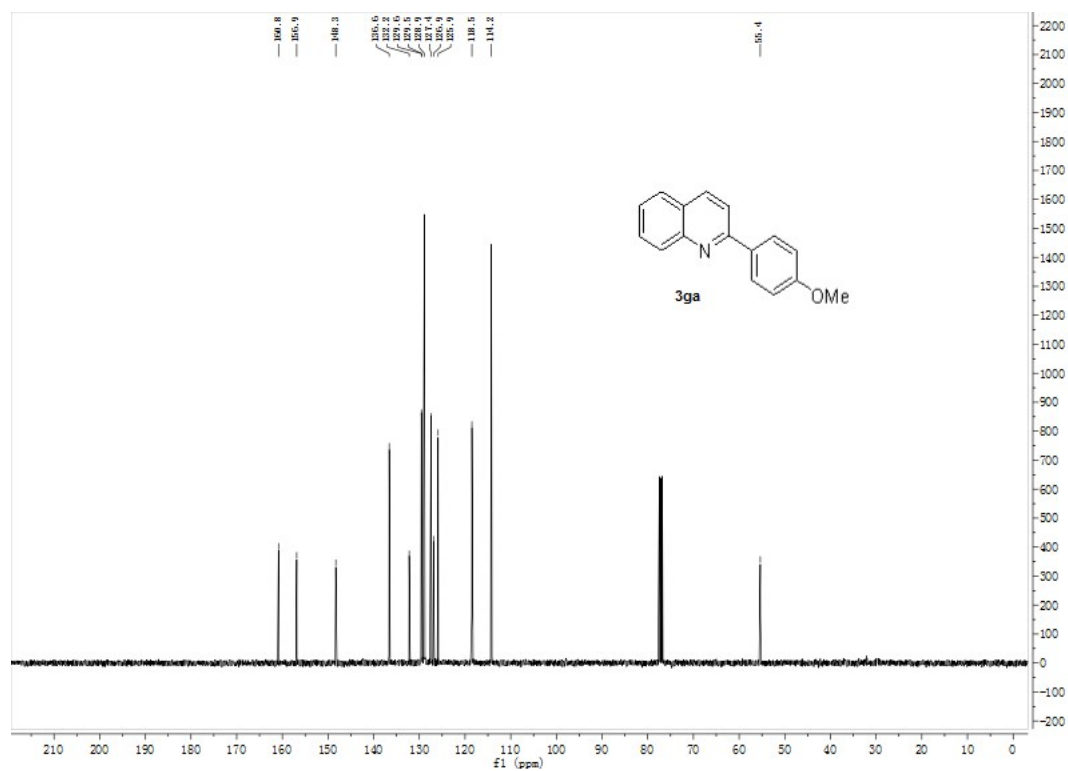

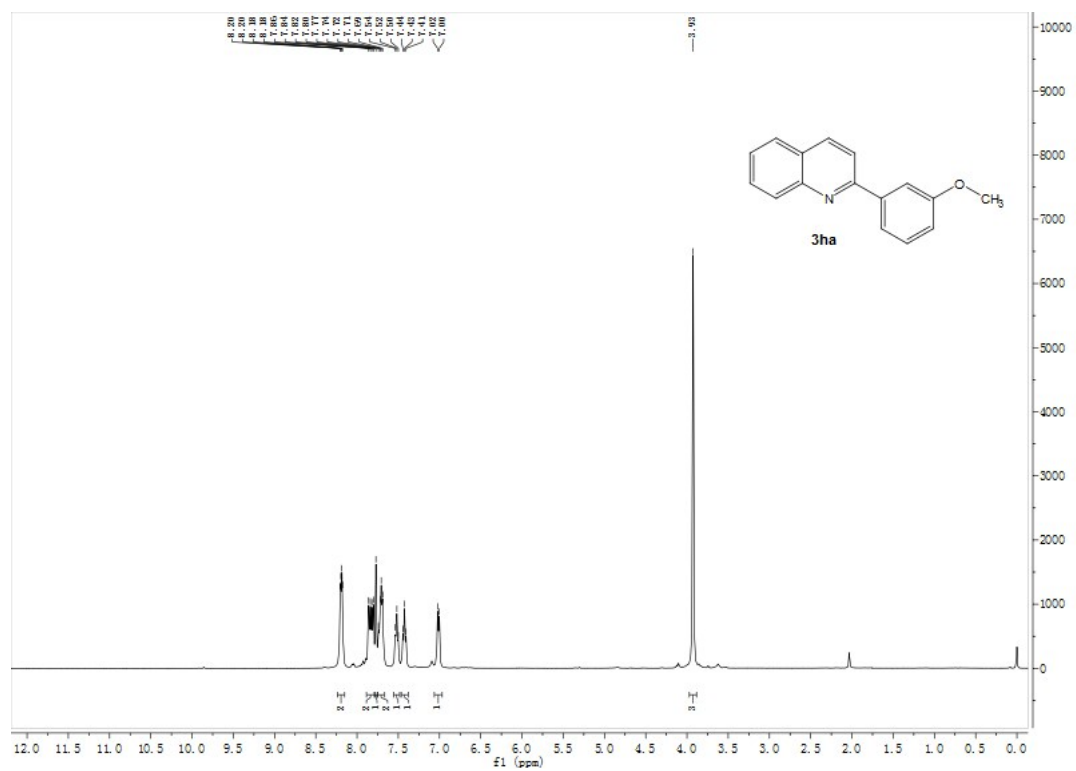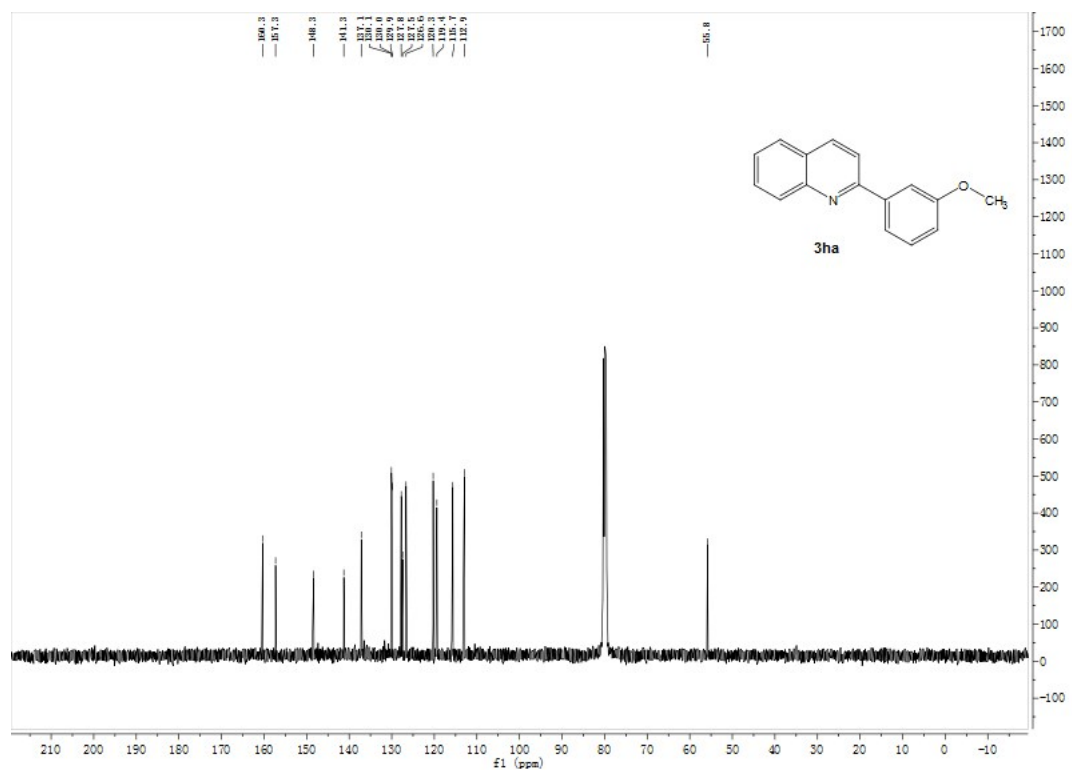



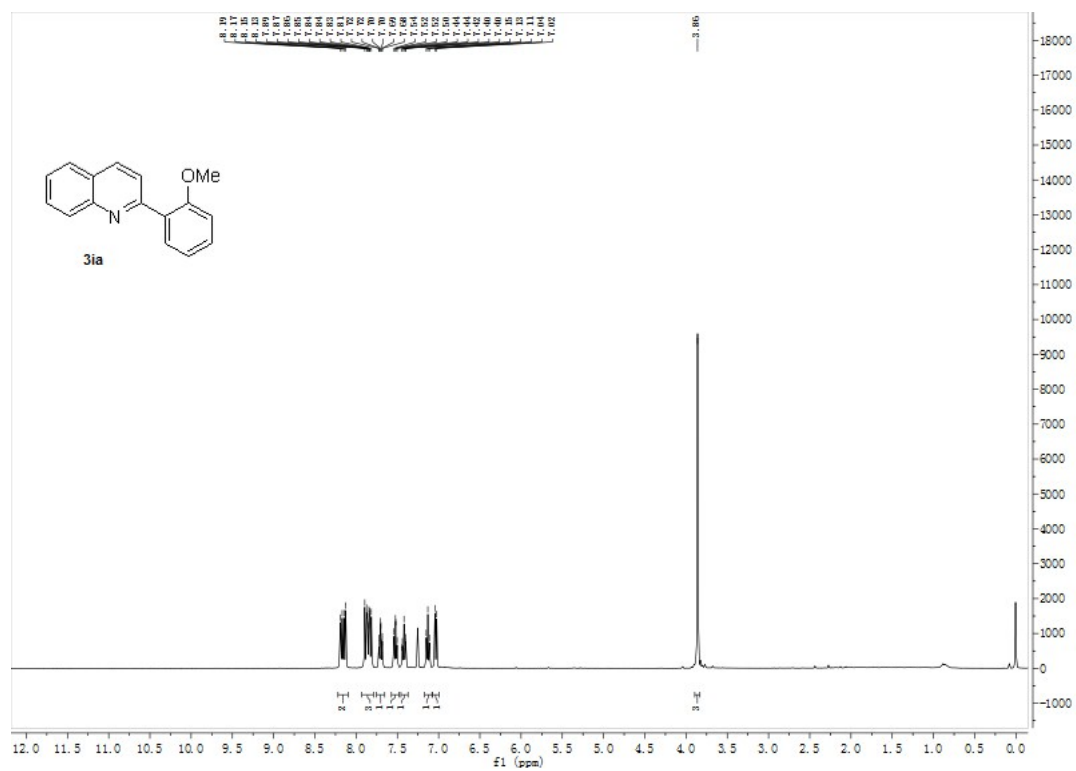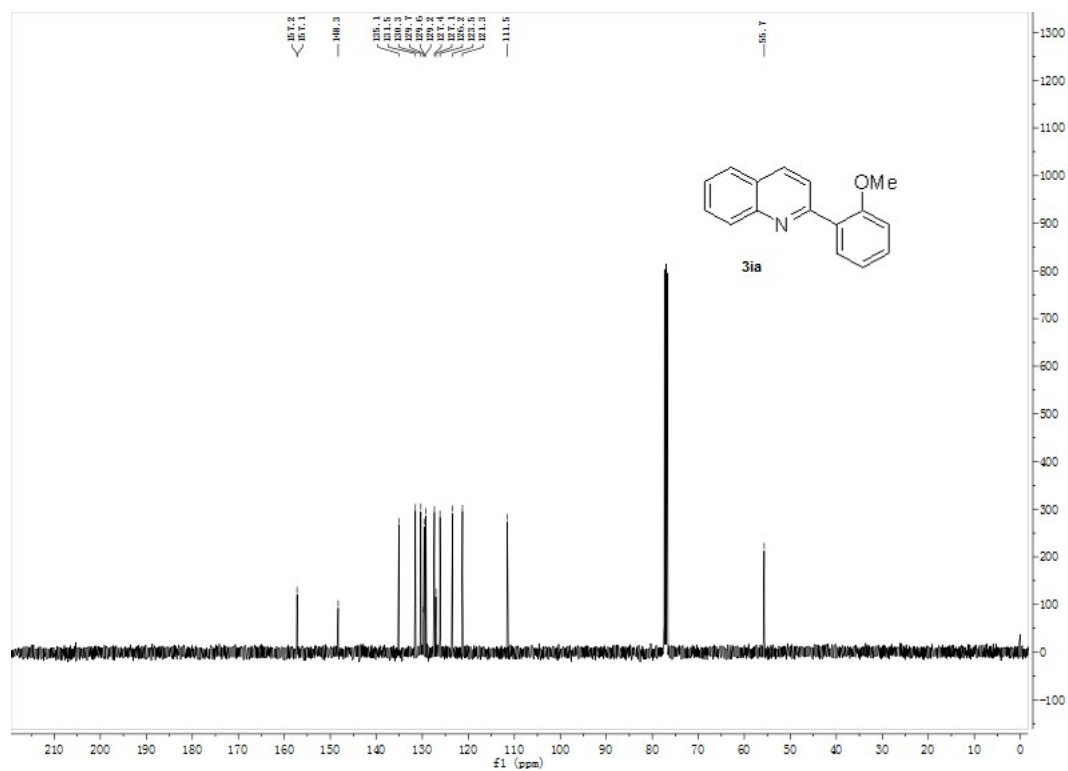

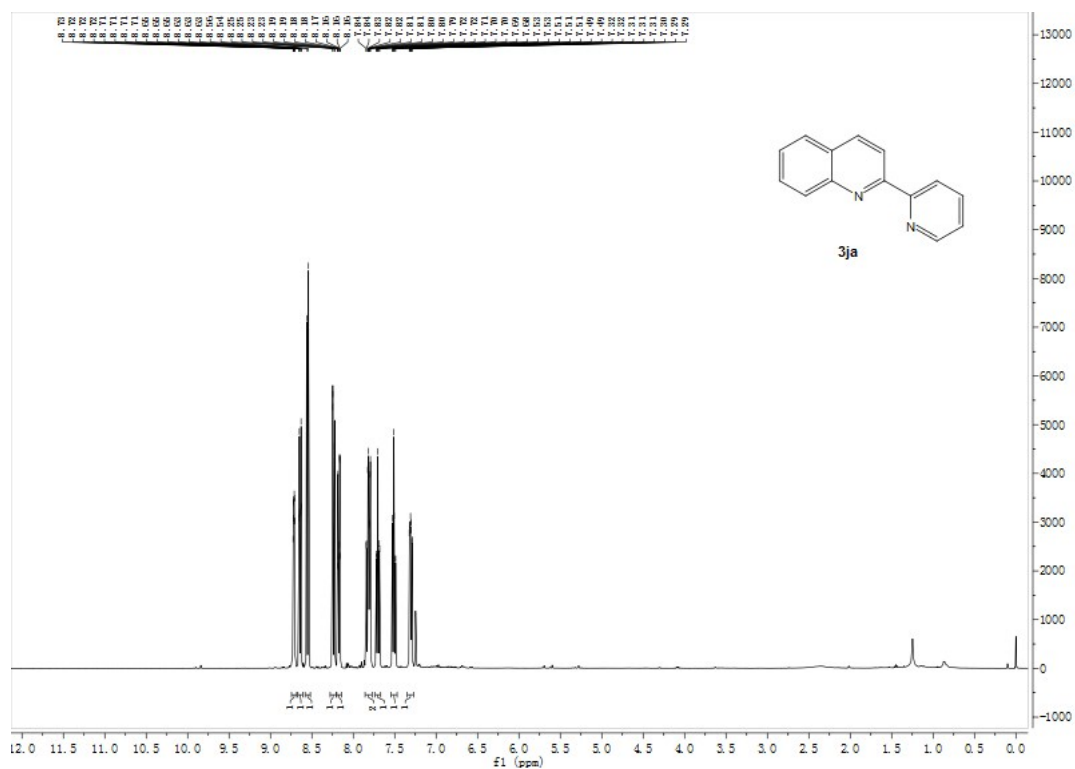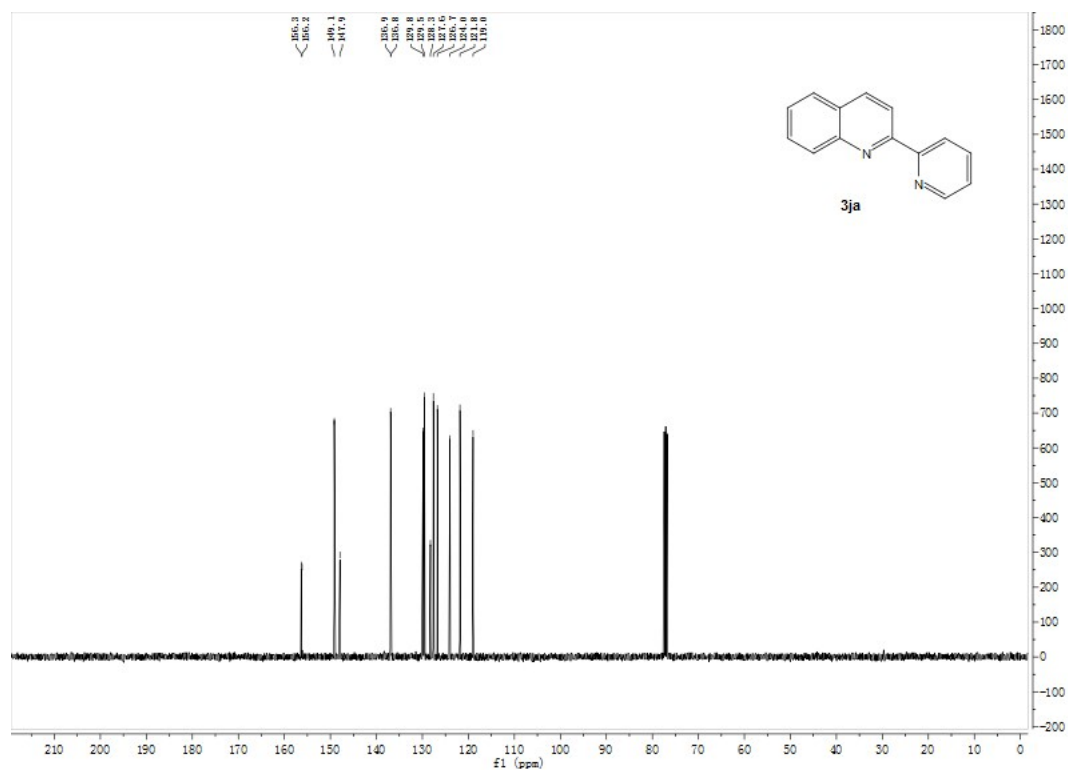



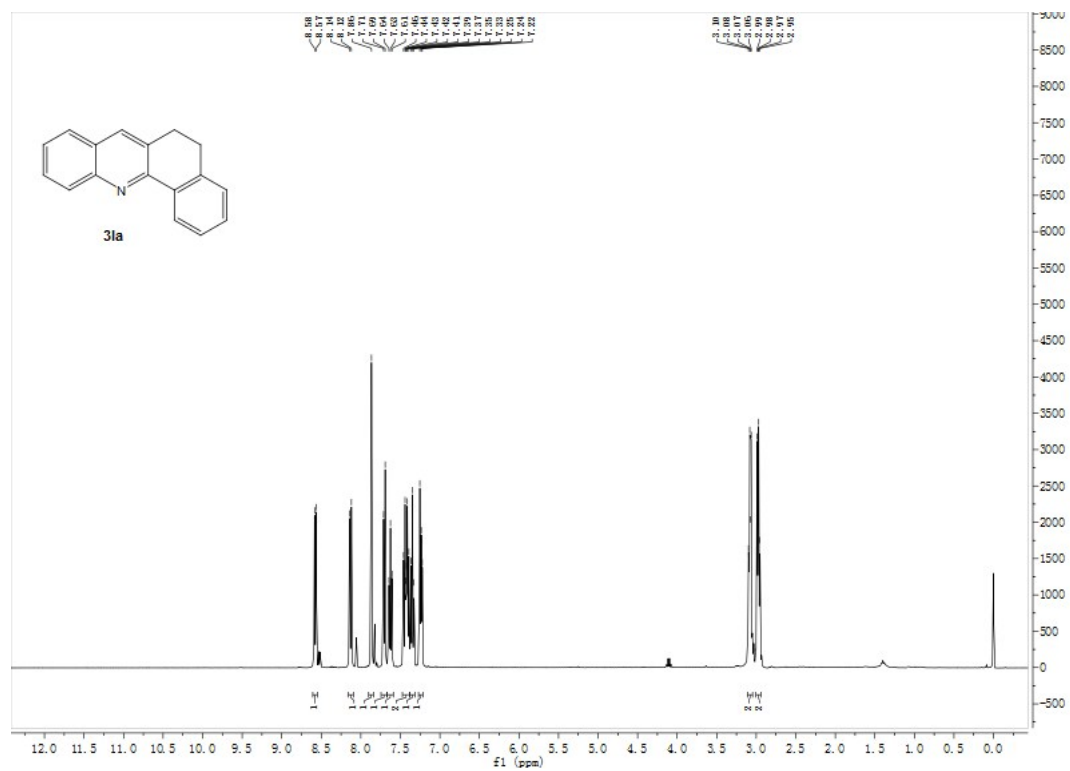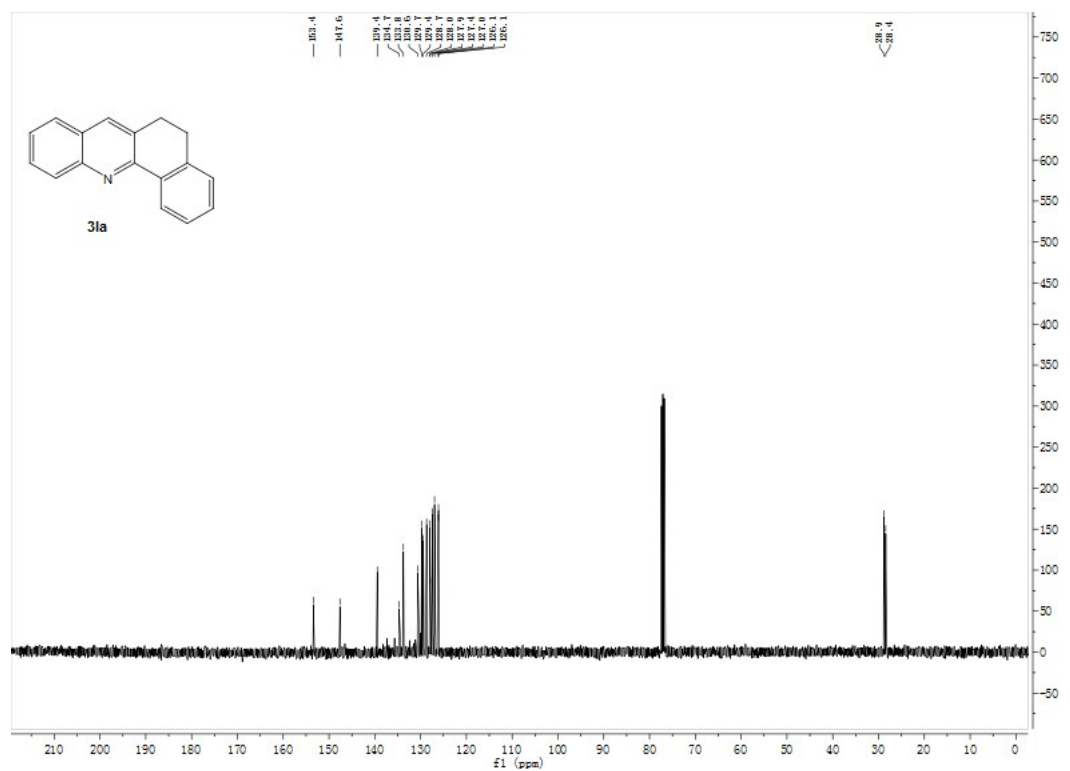





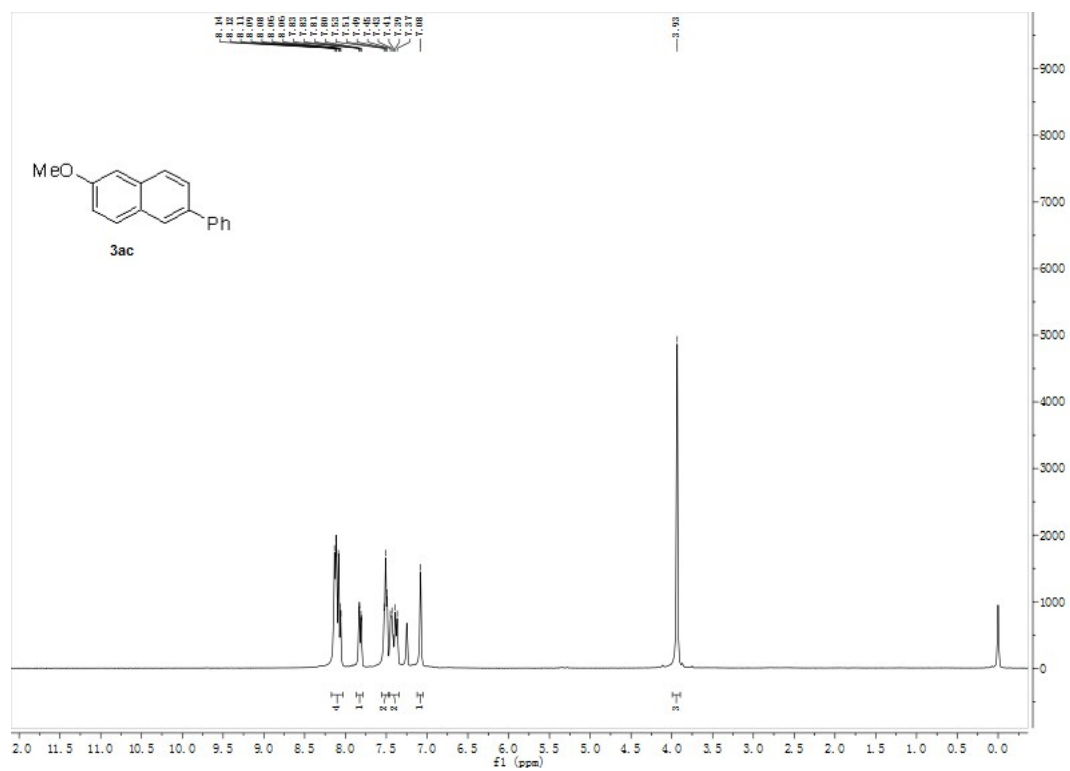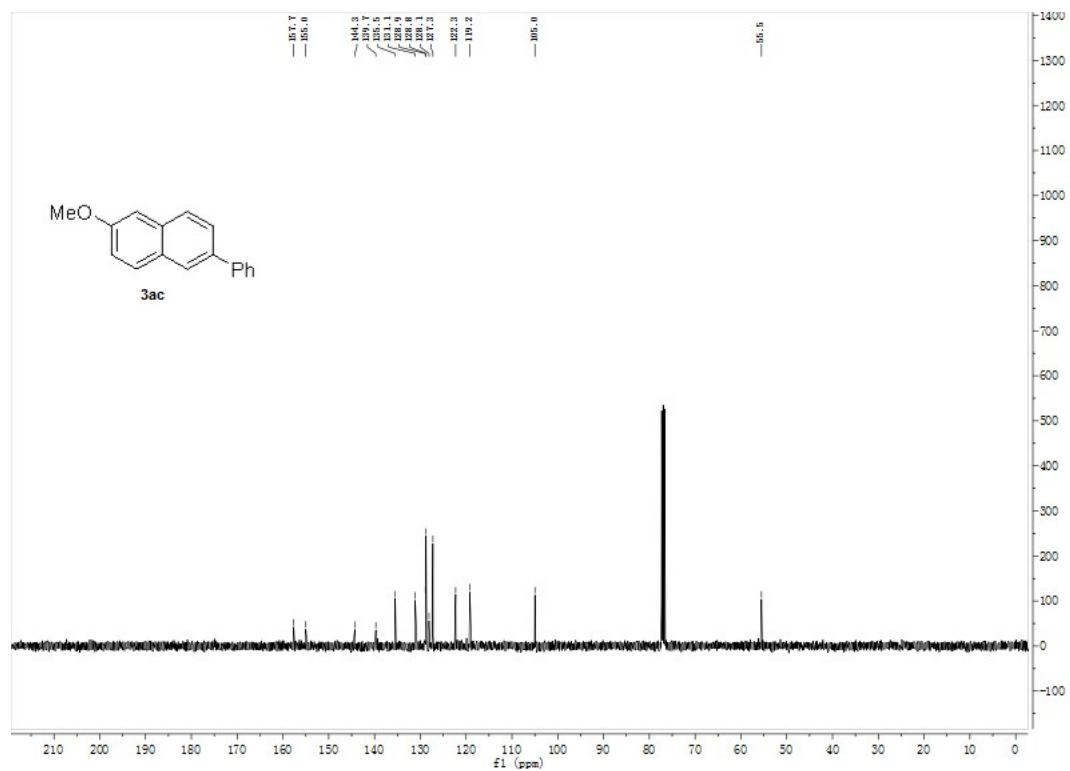

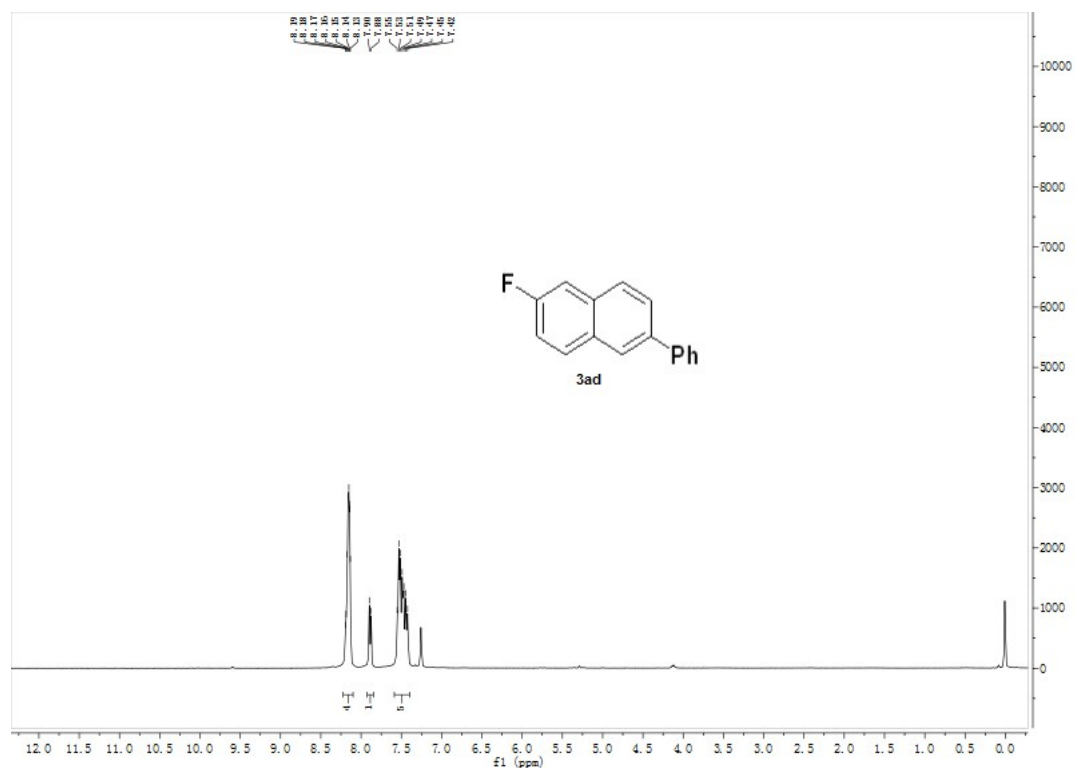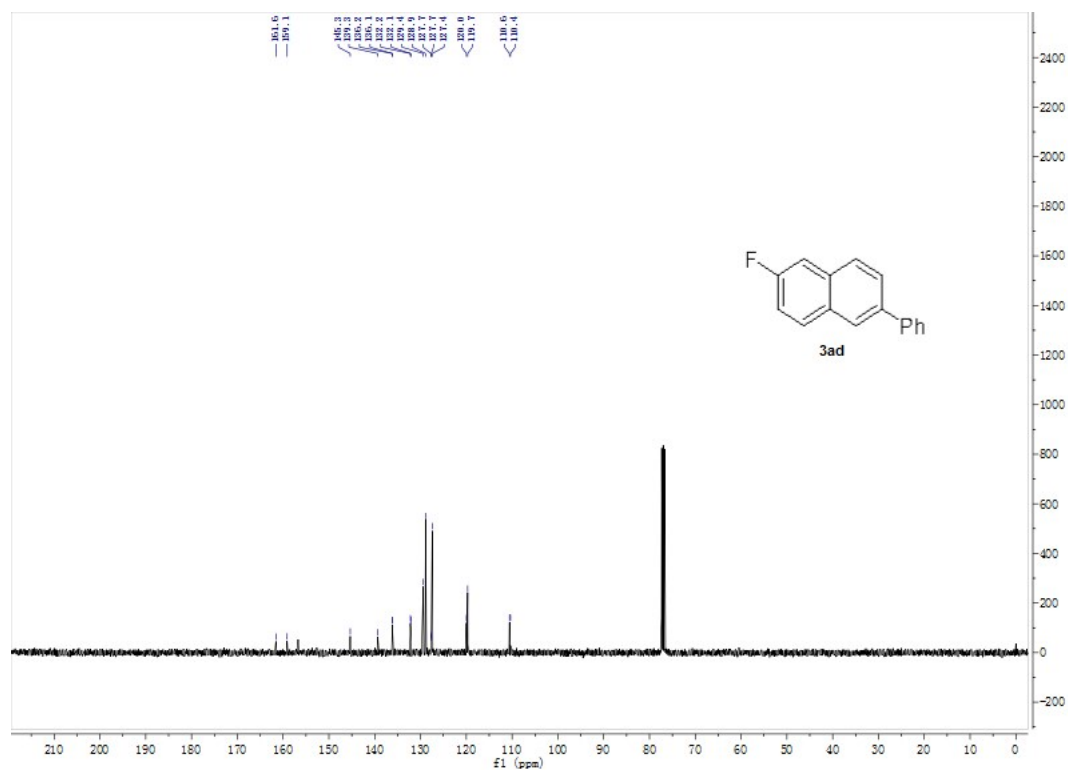



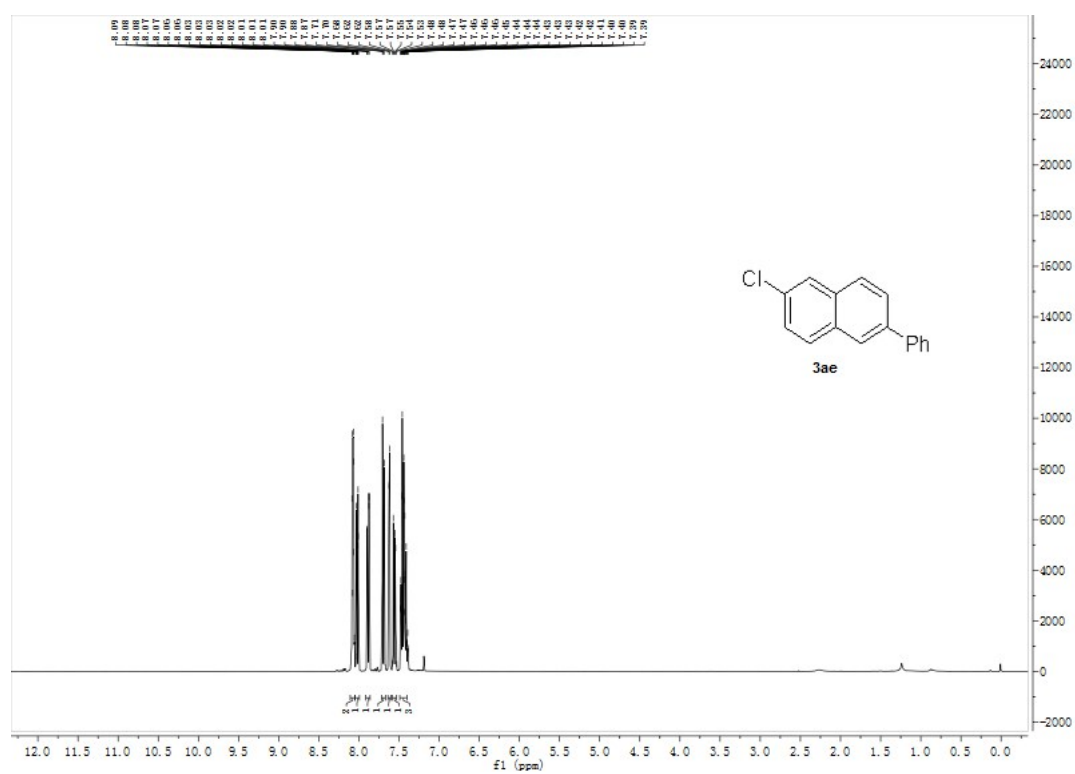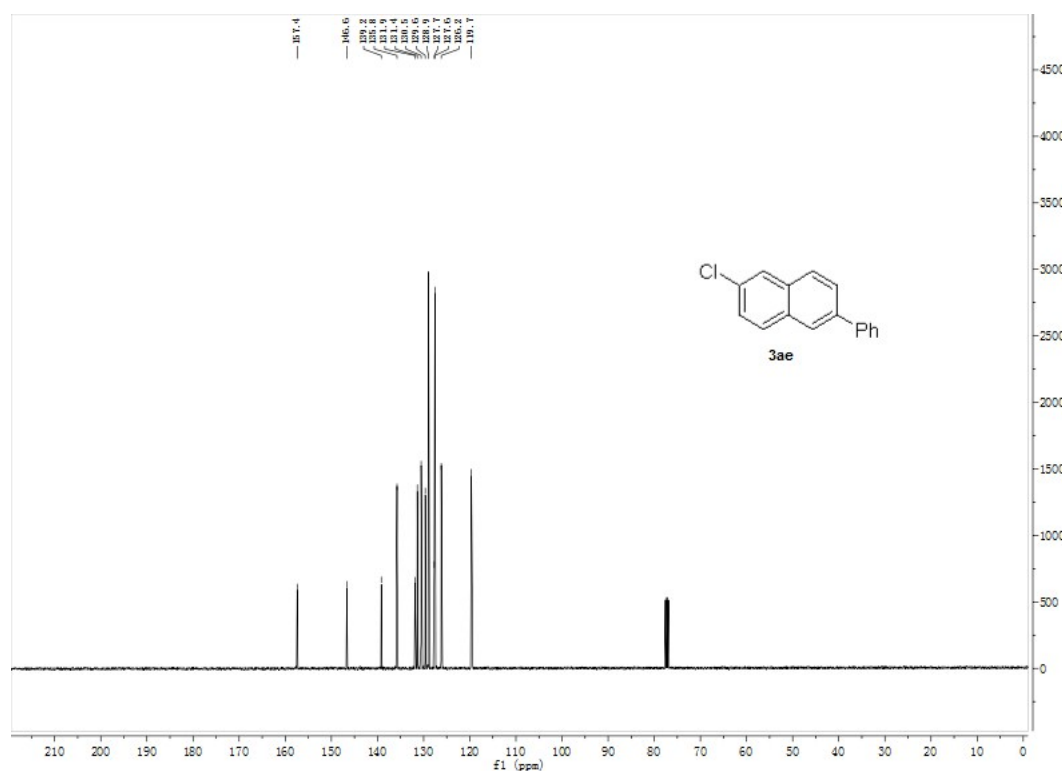

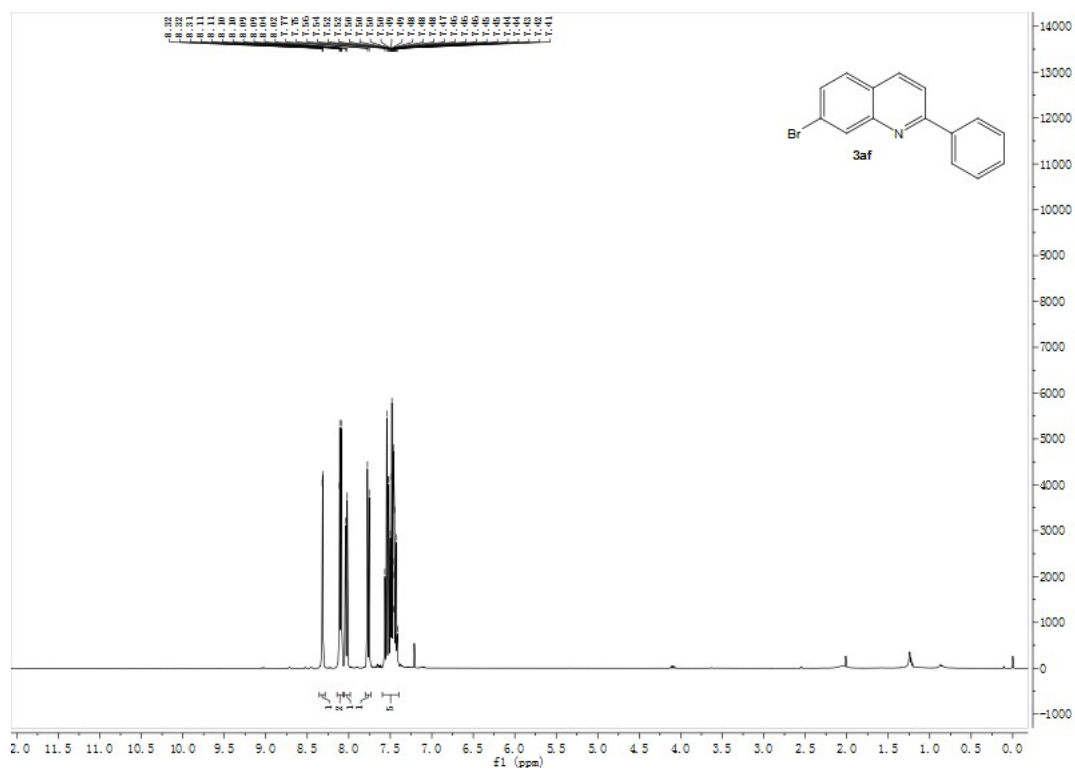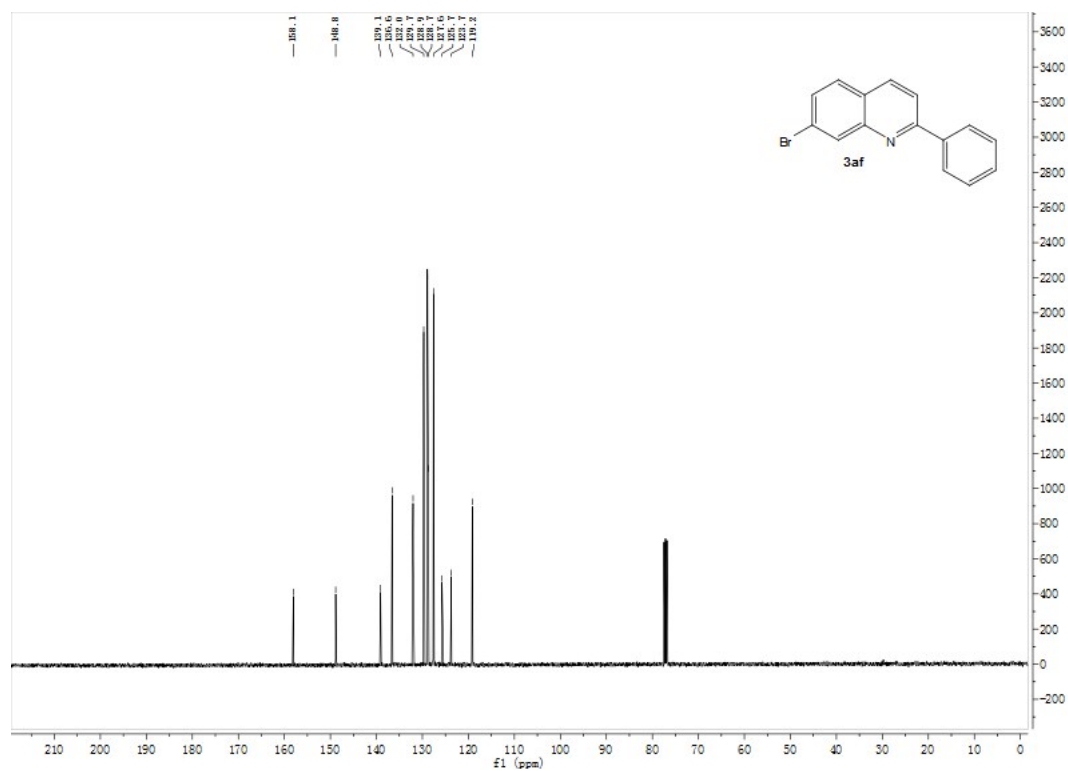

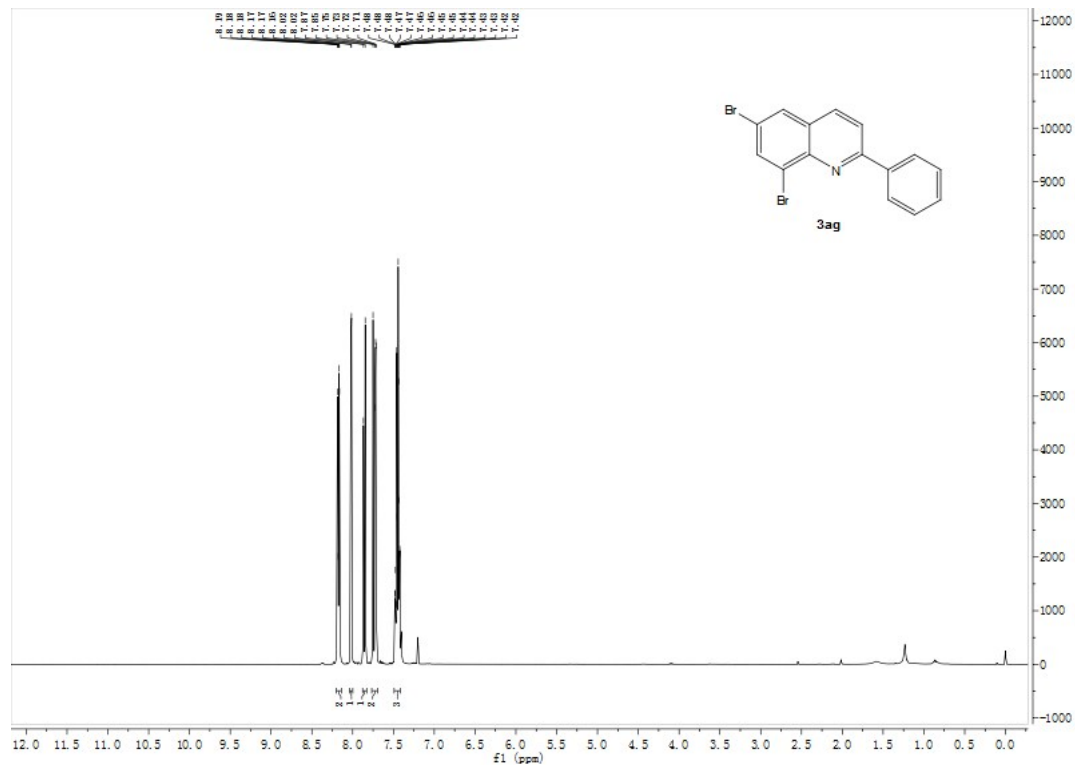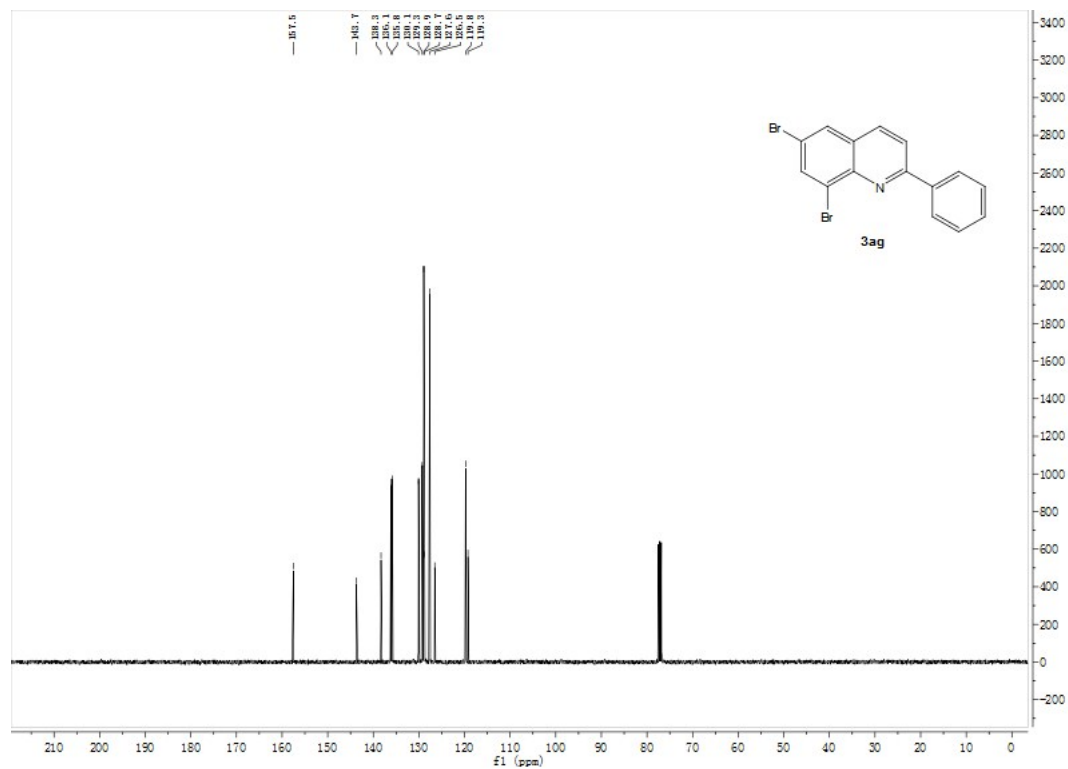

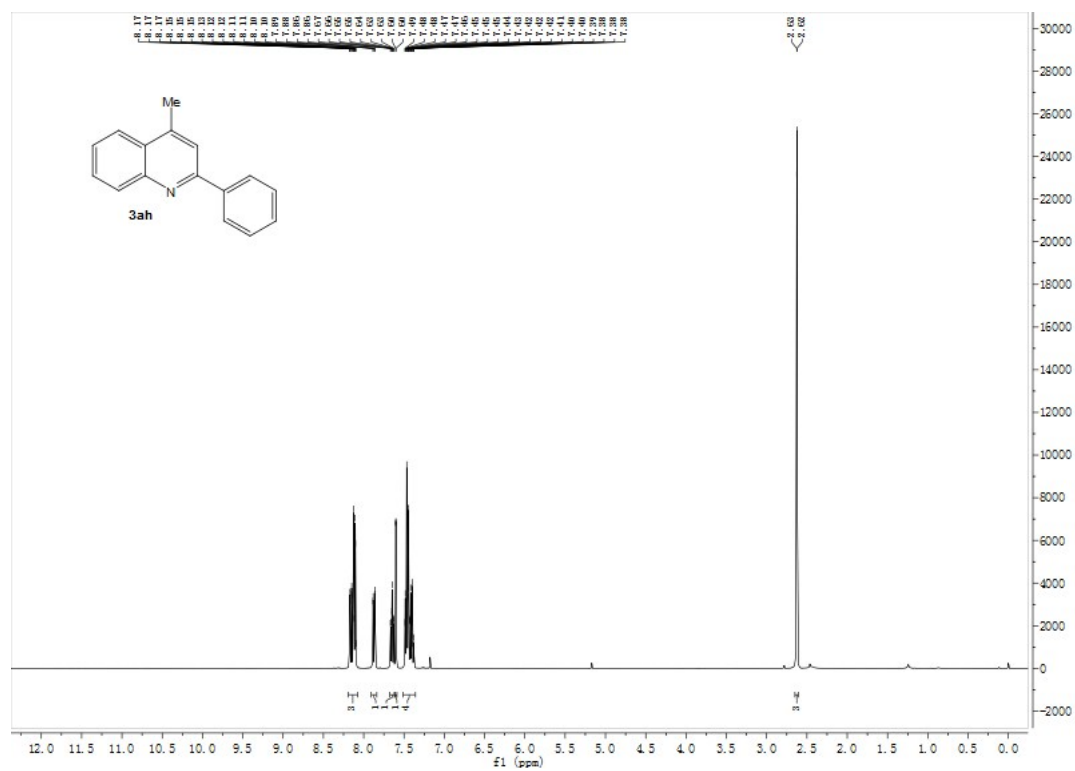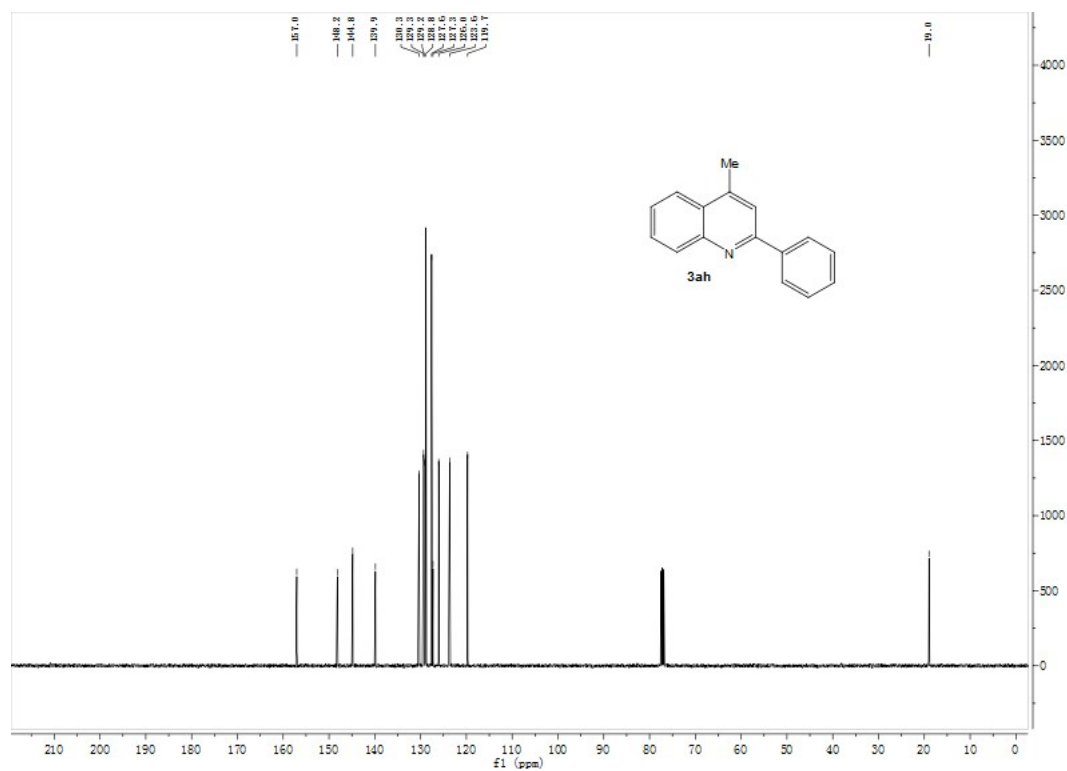

Supplement: c9ra04926f1.pdf [file c9ra04926f1.pdf]
